# Supplementary material
Source: Elsevier journal article supplement (https://www.sciencedirect.com/science/article/pii/S1889183718300643)
Supplement: mmc1 [file S1889183718300643:mmc1.docx]

**ANEXO 1**. Clases de Recomendación

| **Clases de recomendación** | **Definición** | **Denominación propuesta** |
| --- | --- | --- |
| **Clase I** | Evidencia y/o acuerdo general en que un determinado procedimiento diagnóstico/tratamiento es beneficioso, útil y efectivo | Se recomienda/está indicado |
| **Clase II** | Evidencia conflictiva y/o divergencia de opinión acerca de la utilidad/eficacia del tratamiento |  |
| **Clase IIa** | El peso de la evidencia/opinión está a favor de la utilidad/eficacia | Se debe considerar |
| **Clase IIb** | La utilidad/eficacia está menos establecida por la evidencia/opinión | Se puede recomendar |
| **Clase III** | Evidencia o acuerdo general en el que el tratamiento no es útil/efectivo y en algunos casos puede ser perjudicial | No se recomienda |
