# Supplementary material
Source: Elsevier journal article supplement (https://www.sciencedirect.com/science/article/pii/S1889183718300643)
Supplement: mmc2 [file S1889183718300643:mmc2.docx]

**ANEXO 2**. Niveles de Evidencia

| **Nivel de Evidencia A** | Datos procedentes de múltiples ensayos clínicos aleatorizados o metaanálisis |
| --- | --- |
| **Nivel de Evidencia B** | Datos procedentes de un único ensayo clínico aleatorizado o de grandes estudios no aleatorizados |
| **Nivel de Evidencia C** | Consenso de opinión de expertos y/o pequeños estudios, estudios retrospectivos, registros |
